# Supplementary material for: RiboVision suite for visualization and analysis of ribosomes
Source: Royal Society of Chemistry journal article supplement (doi:10.1039/c3fd00126a), 2014-01-01
Supplement: c3fd00126a1.csv [file c3fd00126a1.csv]

resNum	resName	ColorCol	DataDescription
18S:1	U	Bright Red	Nucleotides are colored according to identity using the standard nucleotide coloring code. <span style='color:green'>A</span>, <span style='color:red'>U</span>, <span style='color:blue'>C</span>, G.
18S:2	A	Japanese Laurel
18S:3	U	Bright Red
18S:4	C	Dark Blue
18S:5	U	Bright Red
18S:6	G	Black
18S:7	G	Black
18S:8	U	Bright Red
18S:9	U	Bright Red
18S:10	G	Black
18S:11	A	Japanese Laurel
18S:12	U	Bright Red
18S:13	C	Dark Blue
18S:14	C	Dark Blue
18S:15	U	Bright Red
18S:16	G	Black
18S:17	C	Dark Blue
18S:18	C	Dark Blue
18S:19	A	Japanese Laurel
18S:20	G	Black
18S:21	U	Bright Red
18S:22	A	Japanese Laurel
18S:23	G	Black
18S:24	U	Bright Red
18S:25	C	Dark Blue
18S:26	A	Japanese Laurel
18S:27	U	Bright Red
18S:28	A	Japanese Laurel
18S:29	U	Bright Red
18S:30	G	Black
18S:31	C	Dark Blue
18S:32	U	Bright Red
18S:33	U	Bright Red
18S:34	G	Black
18S:35	U	Bright Red
18S:36	C	Dark Blue
18S:37	U	Bright Red
18S:38	C	Dark Blue
18S:39	A	Japanese Laurel
18S:40	A	Japanese Laurel
18S:41	A	Japanese Laurel
18S:42	G	Black
18S:43	A	Japanese Laurel
18S:44	U	Bright Red
18S:45	U	Bright Red
18S:46	A	Japanese Laurel
18S:47	A	Japanese Laurel
18S:48	G	Black
18S:49	C	Dark Blue
18S:50	C	Dark Blue
18S:51	A	Japanese Laurel
18S:52	U	Bright Red
18S:53	G	Black
18S:54	C	Dark Blue
18S:55	A	Japanese Laurel
18S:56	U	Bright Red
18S:57	G	Black
18S:58	U	Bright Red
18S:59	C	Dark Blue
18S:60	U	Bright Red
18S:61	A	Japanese Laurel
18S:62	A	Japanese Laurel
18S:63	G	Black
18S:64	U	Bright Red
18S:65	A	Japanese Laurel
18S:66	U	Bright Red
18S:67	A	Japanese Laurel
18S:68	A	Japanese Laurel
18S:69	G	Black
18S:70	C	Dark Blue
18S:71	A	Japanese Laurel
18S:72	A	Japanese Laurel
18S:73	U	Bright Red
18S:74	U	Bright Red
18S:75	U	Bright Red
18S:76	A	Japanese Laurel
18S:77	U	Bright Red
18S:78	A	Japanese Laurel
18S:79	C	Dark Blue
18S:80	A	Japanese Laurel
18S:81	G	Black
18S:82	U	Bright Red
18S:83	G	Black
18S:84	A	Japanese Laurel
18S:85	A	Japanese Laurel
18S:86	A	Japanese Laurel
18S:87	C	Dark Blue
18S:88	U	Bright Red
18S:89	G	Black
18S:90	C	Dark Blue
18S:91	G	Black
18S:92	A	Japanese Laurel
18S:93	A	Japanese Laurel
18S:94	U	Bright Red
18S:95	G	Black
18S:96	G	Black
18S:97	C	Dark Blue
18S:98	U	Bright Red
18S:99	C	Dark Blue
18S:100	A	Japanese Laurel
18S:101	U	Bright Red
18S:102	U	Bright Red
18S:103	A	Japanese Laurel
18S:104	A	Japanese Laurel
18S:105	A	Japanese Laurel
18S:106	U	Bright Red
18S:107	C	Dark Blue
18S:108	A	Japanese Laurel
18S:109	G	Black
18S:110	U	Bright Red
18S:111	U	Bright Red
18S:112	A	Japanese Laurel
18S:113	U	Bright Red
18S:114	C	Dark Blue
18S:115	G	Black
18S:116	U	Bright Red
18S:117	U	Bright Red
18S:118	U	Bright Red
18S:119	A	Japanese Laurel
18S:120	U	Bright Red
18S:121	U	Bright Red
18S:122	U	Bright Red
18S:123	G	Black
18S:124	A	Japanese Laurel
18S:125	U	Bright Red
18S:126	A	Japanese Laurel
18S:127	G	Black
18S:128	U	Bright Red
18S:129	U	Bright Red
18S:130	C	Dark Blue
18S:131	C	Dark Blue
18S:132	U	Bright Red
18S:133	U	Bright Red
18S:134	U	Bright Red
18S:135	A	Japanese Laurel
18S:136	C	Dark Blue
18S:137	U	Bright Red
18S:138	A	Japanese Laurel
18S:139	C	Dark Blue
18S:140	A	Japanese Laurel
18S:141	U	Bright Red
18S:142	G	Black
18S:143	G	Black
18S:144	U	Bright Red
18S:145	A	Japanese Laurel
18S:146	U	Bright Red
18S:147	A	Japanese Laurel
18S:148	A	Japanese Laurel
18S:149	C	Dark Blue
18S:150	U	Bright Red
18S:151	G	Black
18S:152	U	Bright Red
18S:153	G	Black
18S:154	G	Black
18S:155	U	Bright Red
18S:156	A	Japanese Laurel
18S:157	A	Japanese Laurel
18S:158	U	Bright Red
18S:159	U	Bright Red
18S:160	C	Dark Blue
18S:161	U	Bright Red
18S:162	A	Japanese Laurel
18S:163	G	Black
18S:164	A	Japanese Laurel
18S:165	G	Black
18S:166	C	Dark Blue
18S:167	U	Bright Red
18S:168	A	Japanese Laurel
18S:169	A	Japanese Laurel
18S:170	U	Bright Red
18S:171	A	Japanese Laurel
18S:172	C	Dark Blue
18S:173	A	Japanese Laurel
18S:174	U	Bright Red
18S:175	G	Black
18S:176	C	Dark Blue
18S:177	U	Bright Red
18S:178	U	Bright Red
18S:179	A	Japanese Laurel
18S:180	A	Japanese Laurel
18S:181	A	Japanese Laurel
18S:182	A	Japanese Laurel
18S:183	U	Bright Red
18S:184	C	Dark Blue
18S:185	U	Bright Red
18S:186	C	Dark Blue
18S:187	G	Black
18S:188	A	Japanese Laurel
18S:189	C	Dark Blue
18S:190	C	Dark Blue
18S:191	C	Dark Blue
18S:192	U	Bright Red
18S:193	U	Bright Red
18S:194	U	Bright Red
18S:195	G	Black
18S:196	G	Black
18S:197	A	Japanese Laurel
18S:198	A	Japanese Laurel
18S:199	G	Black
18S:200	A	Japanese Laurel
18S:201	G	Black
18S:202	A	Japanese Laurel
18S:203	U	Bright Red
18S:204	G	Black
18S:205	U	Bright Red
18S:206	A	Japanese Laurel
18S:207	U	Bright Red
18S:208	U	Bright Red
18S:209	U	Bright Red
18S:210	A	Japanese Laurel
18S:211	U	Bright Red
18S:212	U	Bright Red
18S:213	A	Japanese Laurel
18S:214	G	Black
18S:215	A	Japanese Laurel
18S:216	U	Bright Red
18S:217	A	Japanese Laurel
18S:218	A	Japanese Laurel
18S:219	A	Japanese Laurel
18S:220	A	Japanese Laurel
18S:221	A	Japanese Laurel
18S:222	A	Japanese Laurel
18S:223	U	Bright Red
18S:224	C	Dark Blue
18S:225	A	Japanese Laurel
18S:226	A	Japanese Laurel
18S:227	U	Bright Red
18S:228	G	Black
18S:229	U	Bright Red
18S:230	C	Dark Blue
18S:231	U	Bright Red
18S:232	U	Bright Red
18S:233	C	Dark Blue
18S:234	G	Black
18S:235	G	Black
18S:236	A	Japanese Laurel
18S:237	C	Dark Blue
18S:238	U	Bright Red
18S:239	C	Dark Blue
18S:240	U	Bright Red
18S:241	U	Bright Red
18S:242	U	Bright Red
18S:243	G	Black
18S:244	A	Japanese Laurel
18S:245	U	Bright Red
18S:246	G	Black
18S:247	A	Japanese Laurel
18S:248	U	Bright Red
18S:249	U	Bright Red
18S:250	C	Dark Blue
18S:251	A	Japanese Laurel
18S:252	U	Bright Red
18S:253	A	Japanese Laurel
18S:254	A	Japanese Laurel
18S:255	U	Bright Red
18S:256	A	Japanese Laurel
18S:257	A	Japanese Laurel
18S:258	C	Dark Blue
18S:259	U	Bright Red
18S:260	U	Bright Red
18S:261	U	Bright Red
18S:262	U	Bright Red
18S:263	C	Dark Blue
18S:264	G	Black
18S:265	A	Japanese Laurel
18S:266	A	Japanese Laurel
18S:267	U	Bright Red
18S:268	C	Dark Blue
18S:269	G	Black
18S:270	C	Dark Blue
18S:271	A	Japanese Laurel
18S:272	U	Bright Red
18S:273	G	Black
18S:274	G	Black
18S:275	C	Dark Blue
18S:276	C	Dark Blue
18S:277	U	Bright Red
18S:278	U	Bright Red
18S:279	G	Black
18S:280	U	Bright Red
18S:281	G	Black
18S:282	C	Dark Blue
18S:283	U	Bright Red
18S:284	G	Black
18S:285	G	Black
18S:286	C	Dark Blue
18S:287	G	Black
18S:288	A	Japanese Laurel
18S:289	U	Bright Red
18S:290	G	Black
18S:291	G	Black
18S:292	U	Bright Red
18S:293	U	Bright Red
18S:294	C	Dark Blue
18S:295	A	Japanese Laurel
18S:296	U	Bright Red
18S:297	U	Bright Red
18S:298	C	Dark Blue
18S:299	A	Japanese Laurel
18S:300	A	Japanese Laurel
18S:301	A	Japanese Laurel
18S:302	U	Bright Red
18S:303	U	Bright Red
18S:304	U	Bright Red
18S:305	C	Dark Blue
18S:306	U	Bright Red
18S:307	G	Black
18S:308	C	Dark Blue
18S:309	C	Dark Blue
18S:310	C	Dark Blue
18S:311	U	Bright Red
18S:312	A	Japanese Laurel
18S:313	U	Bright Red
18S:314	C	Dark Blue
18S:315	A	Japanese Laurel
18S:316	A	Japanese Laurel
18S:317	C	Dark Blue
18S:318	U	Bright Red
18S:319	U	Bright Red
18S:320	U	Bright Red
18S:321	C	Dark Blue
18S:322	G	Black
18S:323	A	Japanese Laurel
18S:324	U	Bright Red
18S:325	G	Black
18S:326	G	Black
18S:327	U	Bright Red
18S:328	A	Japanese Laurel
18S:329	G	Black
18S:330	G	Black
18S:331	A	Japanese Laurel
18S:332	U	Bright Red
18S:333	A	Japanese Laurel
18S:334	G	Black
18S:335	U	Bright Red
18S:336	G	Black
18S:337	G	Black
18S:338	C	Dark Blue
18S:339	C	Dark Blue
18S:340	U	Bright Red
18S:341	A	Japanese Laurel
18S:342	C	Dark Blue
18S:343	C	Dark Blue
18S:344	A	Japanese Laurel
18S:345	U	Bright Red
18S:346	G	Black
18S:347	G	Black
18S:348	U	Bright Red
18S:349	U	Bright Red
18S:350	U	Bright Red
18S:351	C	Dark Blue
18S:352	A	Japanese Laurel
18S:353	A	Japanese Laurel
18S:354	C	Dark Blue
18S:355	G	Black
18S:356	G	Black
18S:357	G	Black
18S:358	U	Bright Red
18S:359	A	Japanese Laurel
18S:360	A	Japanese Laurel
18S:361	C	Dark Blue
18S:362	G	Black
18S:363	G	Black
18S:364	G	Black
18S:365	G	Black
18S:366	A	Japanese Laurel
18S:367	A	Japanese Laurel
18S:368	U	Bright Red
18S:369	A	Japanese Laurel
18S:370	A	Japanese Laurel
18S:371	G	Black
18S:372	G	Black
18S:373	G	Black
18S:374	U	Bright Red
18S:375	U	Bright Red
18S:376	C	Dark Blue
18S:377	G	Black
18S:378	A	Japanese Laurel
18S:379	U	Bright Red
18S:380	U	Bright Red
18S:381	C	Dark Blue
18S:382	C	Dark Blue
18S:383	G	Black
18S:384	G	Black
18S:385	A	Japanese Laurel
18S:386	G	Black
18S:387	A	Japanese Laurel
18S:388	G	Black
18S:389	G	Black
18S:390	G	Black
18S:391	A	Japanese Laurel
18S:392	G	Black
18S:393	C	Dark Blue
18S:394	C	Dark Blue
18S:395	U	Bright Red
18S:396	G	Black
18S:397	A	Japanese Laurel
18S:398	G	Black
18S:399	A	Japanese Laurel
18S:400	A	Japanese Laurel
18S:401	A	Japanese Laurel
18S:402	C	Dark Blue
18S:403	G	Black
18S:404	G	Black
18S:405	C	Dark Blue
18S:406	U	Bright Red
18S:407	A	Japanese Laurel
18S:408	C	Dark Blue
18S:409	C	Dark Blue
18S:410	A	Japanese Laurel
18S:411	C	Dark Blue
18S:412	A	Japanese Laurel
18S:413	U	Bright Red
18S:414	C	Dark Blue
18S:415	C	Dark Blue
18S:416	A	Japanese Laurel
18S:417	A	Japanese Laurel
18S:418	G	Black
18S:419	G	Black
18S:420	A	Japanese Laurel
18S:421	A	Japanese Laurel
18S:422	G	Black
18S:423	G	Black
18S:424	C	Dark Blue
18S:425	A	Japanese Laurel
18S:426	G	Black
18S:427	C	Dark Blue
18S:428	A	Japanese Laurel
18S:429	G	Black
18S:430	G	Black
18S:431	C	Dark Blue
18S:432	G	Black
18S:433	C	Dark Blue
18S:434	G	Black
18S:435	C	Dark Blue
18S:436	A	Japanese Laurel
18S:437	A	Japanese Laurel
18S:438	A	Japanese Laurel
18S:439	U	Bright Red
18S:440	U	Bright Red
18S:441	A	Japanese Laurel
18S:442	C	Dark Blue
18S:443	C	Dark Blue
18S:444	C	Dark Blue
18S:445	A	Japanese Laurel
18S:446	A	Japanese Laurel
18S:447	U	Bright Red
18S:448	C	Dark Blue
18S:449	C	Dark Blue
18S:450	U	Bright Red
18S:451	A	Japanese Laurel
18S:452	A	Japanese Laurel
18S:453	U	Bright Red
18S:454	U	Bright Red
18S:455	C	Dark Blue
18S:456	A	Japanese Laurel
18S:457	G	Black
18S:458	G	Black
18S:459	G	Black
18S:460	A	Japanese Laurel
18S:461	G	Black
18S:462	G	Black
18S:463	U	Bright Red
18S:464	A	Japanese Laurel
18S:465	G	Black
18S:466	U	Bright Red
18S:467	G	Black
18S:468	A	Japanese Laurel
18S:469	C	Dark Blue
18S:470	A	Japanese Laurel
18S:471	A	Japanese Laurel
18S:472	U	Bright Red
18S:473	A	Japanese Laurel
18S:474	A	Japanese Laurel
18S:475	A	Japanese Laurel
18S:476	U	Bright Red
18S:477	A	Japanese Laurel
18S:478	A	Japanese Laurel
18S:479	C	Dark Blue
18S:480	G	Black
18S:481	A	Japanese Laurel
18S:482	U	Bright Red
18S:483	A	Japanese Laurel
18S:484	C	Dark Blue
18S:485	A	Japanese Laurel
18S:486	G	Black
18S:487	G	Black
18S:488	G	Black
18S:489	C	Dark Blue
18S:490	C	Dark Blue
18S:491	C	Dark Blue
18S:492	A	Japanese Laurel
18S:493	U	Bright Red
18S:494	U	Bright Red
18S:495	C	Dark Blue
18S:496	G	Black
18S:497	G	Black
18S:498	G	Black
18S:499	U	Bright Red
18S:500	C	Dark Blue
18S:501	U	Bright Red
18S:502	U	Bright Red
18S:503	G	Black
18S:504	U	Bright Red
18S:505	A	Japanese Laurel
18S:506	A	Japanese Laurel
18S:507	U	Bright Red
18S:508	U	Bright Red
18S:509	G	Black
18S:510	G	Black
18S:511	A	Japanese Laurel
18S:512	A	Japanese Laurel
18S:513	U	Bright Red
18S:514	G	Black
18S:515	A	Japanese Laurel
18S:516	G	Black
18S:517	U	Bright Red
18S:518	A	Japanese Laurel
18S:519	C	Dark Blue
18S:520	A	Japanese Laurel
18S:521	A	Japanese Laurel
18S:522	U	Bright Red
18S:523	G	Black
18S:524	U	Bright Red
18S:525	A	Japanese Laurel
18S:526	A	Japanese Laurel
18S:527	A	Japanese Laurel
18S:528	U	Bright Red
18S:529	A	Japanese Laurel
18S:530	C	Dark Blue
18S:531	C	Dark Blue
18S:532	U	Bright Red
18S:533	U	Bright Red
18S:534	A	Japanese Laurel
18S:535	A	Japanese Laurel
18S:536	C	Dark Blue
18S:537	G	Black
18S:538	A	Japanese Laurel
18S:539	G	Black
18S:540	G	Black
18S:541	A	Japanese Laurel
18S:542	A	Japanese Laurel
18S:543	C	Dark Blue
18S:544	A	Japanese Laurel
18S:545	A	Japanese Laurel
18S:546	U	Bright Red
18S:547	U	Bright Red
18S:548	G	Black
18S:549	G	Black
18S:550	A	Japanese Laurel
18S:551	G	Black
18S:552	G	Black
18S:553	G	Black
18S:554	C	Dark Blue
18S:555	A	Japanese Laurel
18S:556	A	Japanese Laurel
18S:557	G	Black
18S:558	U	Bright Red
18S:559	C	Dark Blue
18S:560	U	Bright Red
18S:561	G	Black
18S:562	G	Black
18S:563	U	Bright Red
18S:564	G	Black
18S:565	C	Dark Blue
18S:566	C	Dark Blue
18S:567	A	Japanese Laurel
18S:568	G	Black
18S:569	C	Dark Blue
18S:570	A	Japanese Laurel
18S:571	G	Black
18S:572	C	Dark Blue
18S:573	C	Dark Blue
18S:574	G	Black
18S:575	C	Dark Blue
18S:576	G	Black
18S:577	G	Black
18S:578	U	Bright Red
18S:579	A	Japanese Laurel
18S:580	A	Japanese Laurel
18S:581	U	Bright Red
18S:582	U	Bright Red
18S:583	C	Dark Blue
18S:584	C	Dark Blue
18S:585	A	Japanese Laurel
18S:586	G	Black
18S:587	C	Dark Blue
18S:588	U	Bright Red
18S:589	C	Dark Blue
18S:590	C	Dark Blue
18S:591	A	Japanese Laurel
18S:592	A	Japanese Laurel
18S:593	U	Bright Red
18S:594	A	Japanese Laurel
18S:595	G	Black
18S:596	C	Dark Blue
18S:597	G	Black
18S:598	U	Bright Red
18S:599	A	Japanese Laurel
18S:600	U	Bright Red
18S:601	A	Japanese Laurel
18S:602	U	Bright Red
18S:603	U	Bright Red
18S:604	A	Japanese Laurel
18S:605	A	Japanese Laurel
18S:606	A	Japanese Laurel
18S:607	G	Black
18S:608	U	Bright Red
18S:609	U	Bright Red
18S:610	G	Black
18S:611	U	Bright Red
18S:612	U	Bright Red
18S:613	G	Black
18S:614	C	Dark Blue
18S:615	A	Japanese Laurel
18S:616	G	Black
18S:617	U	Bright Red
18S:618	U	Bright Red
18S:619	A	Japanese Laurel
18S:620	A	Japanese Laurel
18S:621	A	Japanese Laurel
18S:622	A	Japanese Laurel
18S:623	A	Japanese Laurel
18S:624	G	Black
18S:625	C	Dark Blue
18S:626	U	Bright Red
18S:627	C	Dark Blue
18S:628	G	Black
18S:629	U	Bright Red
18S:630	A	Japanese Laurel
18S:631	G	Black
18S:632	U	Bright Red
18S:633	U	Bright Red
18S:634	G	Black
18S:635	A	Japanese Laurel
18S:636	A	Japanese Laurel
18S:637	C	Dark Blue
18S:638	U	Bright Red
18S:639	U	Bright Red
18S:640	U	Bright Red
18S:641	G	Black
18S:642	G	Black
18S:643	G	Black
18S:644	C	Dark Blue
18S:645	C	Dark Blue
18S:646	C	Dark Blue
18S:647	G	Black
18S:648	G	Black
18S:649	U	Bright Red
18S:650	U	Bright Red
18S:651	G	Black
18S:652	G	Black
18S:653	C	Dark Blue
18S:654	C	Dark Blue
18S:655	G	Black
18S:656	G	Black
18S:657	U	Bright Red
18S:658	C	Dark Blue
18S:659	C	Dark Blue
18S:660	G	Black
18S:661	A	Japanese Laurel
18S:662	U	Bright Red
18S:663	U	Bright Red
18S:664	U	Bright Red
18S:665	U	Bright Red
18S:666	U	Bright Red
18S:667	U	Bright Red
18S:668	C	Dark Blue
18S:669	G	Black
18S:670	U	Bright Red
18S:671	G	Black
18S:672	U	Bright Red
18S:673	A	Japanese Laurel
18S:674	C	Dark Blue
18S:675	U	Bright Red
18S:676	G	Black
18S:677	G	Black
18S:678	A	Japanese Laurel
18S:679	U	Bright Red
18S:680	U	Bright Red
18S:681	U	Bright Red
18S:682	C	Dark Blue
18S:683	C	Dark Blue
18S:684	A	Japanese Laurel
18S:685	A	Japanese Laurel
18S:686	C	Dark Blue
18S:687	G	Black
18S:688	G	Black
18S:689	G	Black
18S:690	G	Black
18S:691	C	Dark Blue
18S:692	C	Dark Blue
18S:693	U	Bright Red
18S:694	U	Bright Red
18S:695	U	Bright Red
18S:696	C	Dark Blue
18S:697	C	Dark Blue
18S:698	U	Bright Red
18S:699	U	Bright Red
18S:700	C	Dark Blue
18S:701	U	Bright Red
18S:702	G	Black
18S:703	G	Black
18S:704	C	Dark Blue
18S:705	U	Bright Red
18S:706	A	Japanese Laurel
18S:707	A	Japanese Laurel
18S:708	C	Dark Blue
18S:709	C	Dark Blue
18S:710	U	Bright Red
18S:711	U	Bright Red
18S:712	G	Black
18S:713	A	Japanese Laurel
18S:714	G	Black
18S:715	U	Bright Red
18S:716	C	Dark Blue
18S:717	C	Dark Blue
18S:718	U	Bright Red
18S:719	U	Bright Red
18S:720	G	Black
18S:721	U	Bright Red
18S:722	G	Black
18S:723	G	Black
18S:724	C	Dark Blue
18S:725	U	Bright Red
18S:726	C	Dark Blue
18S:727	U	Bright Red
18S:728	U	Bright Red
18S:729	G	Black
18S:730	G	Black
18S:731	C	Dark Blue
18S:732	G	Black
18S:733	A	Japanese Laurel
18S:734	A	Japanese Laurel
18S:735	C	Dark Blue
18S:736	C	Dark Blue
18S:737	A	Japanese Laurel
18S:738	G	Black
18S:739	G	Black
18S:740	A	Japanese Laurel
18S:741	C	Dark Blue
18S:742	U	Bright Red
18S:743	U	Bright Red
18S:744	U	Bright Red
18S:745	U	Bright Red
18S:746	A	Japanese Laurel
18S:747	C	Dark Blue
18S:748	U	Bright Red
18S:749	U	Bright Red
18S:750	U	Bright Red
18S:751	G	Black
18S:752	A	Japanese Laurel
18S:753	A	Japanese Laurel
18S:754	A	Japanese Laurel
18S:755	A	Japanese Laurel
18S:756	A	Japanese Laurel
18S:757	A	Japanese Laurel
18S:758	U	Bright Red
18S:759	U	Bright Red
18S:760	A	Japanese Laurel
18S:761	G	Black
18S:762	A	Japanese Laurel
18S:763	G	Black
18S:764	U	Bright Red
18S:765	G	Black
18S:766	U	Bright Red
18S:767	U	Bright Red
18S:768	C	Dark Blue
18S:769	A	Japanese Laurel
18S:770	A	Japanese Laurel
18S:771	A	Japanese Laurel
18S:772	G	Black
18S:773	C	Dark Blue
18S:774	A	Japanese Laurel
18S:775	G	Black
18S:776	G	Black
18S:777	C	Dark Blue
18S:778	G	Black
18S:779	U	Bright Red
18S:780	A	Japanese Laurel
18S:781	U	Bright Red
18S:782	U	Bright Red
18S:783	G	Black
18S:784	C	Dark Blue
18S:785	U	Bright Red
18S:786	C	Dark Blue
18S:787	G	Black
18S:788	A	Japanese Laurel
18S:789	A	Japanese Laurel
18S:790	U	Bright Red
18S:791	A	Japanese Laurel
18S:792	U	Bright Red
18S:793	A	Japanese Laurel
18S:794	U	Bright Red
18S:795	U	Bright Red
18S:796	A	Japanese Laurel
18S:797	G	Black
18S:798	C	Dark Blue
18S:799	A	Japanese Laurel
18S:800	U	Bright Red
18S:801	G	Black
18S:802	G	Black
18S:803	A	Japanese Laurel
18S:804	A	Japanese Laurel
18S:805	U	Bright Red
18S:806	A	Japanese Laurel
18S:807	A	Japanese Laurel
18S:808	U	Bright Red
18S:809	A	Japanese Laurel
18S:810	G	Black
18S:811	A	Japanese Laurel
18S:812	A	Japanese Laurel
18S:813	U	Bright Red
18S:814	A	Japanese Laurel
18S:815	G	Black
18S:816	G	Black
18S:817	A	Japanese Laurel
18S:818	C	Dark Blue
18S:819	G	Black
18S:820	U	Bright Red
18S:821	U	Bright Red
18S:822	U	Bright Red
18S:823	G	Black
18S:824	G	Black
18S:825	U	Bright Red
18S:826	U	Bright Red
18S:827	C	Dark Blue
18S:828	U	Bright Red
18S:829	A	Japanese Laurel
18S:830	U	Bright Red
18S:831	U	Bright Red
18S:832	U	Bright Red
18S:833	U	Bright Red
18S:834	G	Black
18S:835	U	Bright Red
18S:836	U	Bright Red
18S:837	G	Black
18S:838	G	Black
18S:839	U	Bright Red
18S:840	U	Bright Red
18S:841	U	Bright Red
18S:842	C	Dark Blue
18S:843	U	Bright Red
18S:844	A	Japanese Laurel
18S:845	G	Black
18S:846	G	Black
18S:847	A	Japanese Laurel
18S:848	C	Dark Blue
18S:849	C	Dark Blue
18S:850	A	Japanese Laurel
18S:851	U	Bright Red
18S:852	C	Dark Blue
18S:853	G	Black
18S:854	U	Bright Red
18S:855	A	Japanese Laurel
18S:856	A	Japanese Laurel
18S:857	U	Bright Red
18S:858	G	Black
18S:859	A	Japanese Laurel
18S:860	U	Bright Red
18S:861	U	Bright Red
18S:862	A	Japanese Laurel
18S:863	A	Japanese Laurel
18S:864	U	Bright Red
18S:865	A	Japanese Laurel
18S:866	G	Black
18S:867	G	Black
18S:868	G	Black
18S:869	A	Japanese Laurel
18S:870	C	Dark Blue
18S:871	G	Black
18S:872	G	Black
18S:873	U	Bright Red
18S:874	C	Dark Blue
18S:875	G	Black
18S:876	G	Black
18S:877	G	Black
18S:878	G	Black
18S:879	G	Black
18S:880	C	Dark Blue
18S:881	A	Japanese Laurel
18S:882	U	Bright Red
18S:883	C	Dark Blue
18S:884	A	Japanese Laurel
18S:885	G	Black
18S:886	U	Bright Red
18S:887	A	Japanese Laurel
18S:888	U	Bright Red
18S:889	U	Bright Red
18S:890	C	Dark Blue
18S:891	A	Japanese Laurel
18S:892	A	Japanese Laurel
18S:893	U	Bright Red
18S:894	U	Bright Red
18S:895	G	Black
18S:896	U	Bright Red
18S:897	C	Dark Blue
18S:898	A	Japanese Laurel
18S:899	G	Black
18S:900	A	Japanese Laurel
18S:901	G	Black
18S:902	G	Black
18S:903	U	Bright Red
18S:904	G	Black
18S:905	A	Japanese Laurel
18S:906	A	Japanese Laurel
18S:907	A	Japanese Laurel
18S:908	U	Bright Red
18S:909	U	Bright Red
18S:910	C	Dark Blue
18S:911	U	Bright Red
18S:912	U	Bright Red
18S:913	G	Black
18S:914	G	Black
18S:915	A	Japanese Laurel
18S:916	U	Bright Red
18S:917	U	Bright Red
18S:918	U	Bright Red
18S:919	A	Japanese Laurel
18S:920	U	Bright Red
18S:921	U	Bright Red
18S:922	G	Black
18S:923	A	Japanese Laurel
18S:924	A	Japanese Laurel
18S:925	G	Black
18S:926	A	Japanese Laurel
18S:927	C	Dark Blue
18S:928	U	Bright Red
18S:929	A	Japanese Laurel
18S:930	A	Japanese Laurel
18S:931	C	Dark Blue
18S:932	U	Bright Red
18S:933	A	Japanese Laurel
18S:934	C	Dark Blue
18S:935	U	Bright Red
18S:936	G	Black
18S:937	C	Dark Blue
18S:938	G	Black
18S:939	A	Japanese Laurel
18S:940	A	Japanese Laurel
18S:941	A	Japanese Laurel
18S:942	G	Black
18S:943	C	Dark Blue
18S:944	A	Japanese Laurel
18S:945	U	Bright Red
18S:946	U	Bright Red
18S:947	U	Bright Red
18S:948	G	Black
18S:949	C	Dark Blue
18S:950	C	Dark Blue
18S:951	A	Japanese Laurel
18S:952	A	Japanese Laurel
18S:953	G	Black
18S:954	G	Black
18S:955	A	Japanese Laurel
18S:956	C	Dark Blue
18S:957	G	Black
18S:958	U	Bright Red
18S:959	U	Bright Red
18S:960	U	Bright Red
18S:961	U	Bright Red
18S:962	C	Dark Blue
18S:963	A	Japanese Laurel
18S:964	U	Bright Red
18S:965	U	Bright Red
18S:966	A	Japanese Laurel
18S:967	A	Japanese Laurel
18S:968	U	Bright Red
18S:969	C	Dark Blue
18S:970	A	Japanese Laurel
18S:971	A	Japanese Laurel
18S:972	G	Black
18S:973	A	Japanese Laurel
18S:974	A	Japanese Laurel
18S:975	C	Dark Blue
18S:976	G	Black
18S:977	A	Japanese Laurel
18S:978	A	Japanese Laurel
18S:979	A	Japanese Laurel
18S:980	G	Black
18S:981	U	Bright Red
18S:982	U	Bright Red
18S:983	A	Japanese Laurel
18S:984	G	Black
18S:985	G	Black
18S:986	G	Black
18S:987	G	Black
18S:988	A	Japanese Laurel
18S:989	U	Bright Red
18S:990	C	Dark Blue
18S:991	G	Black
18S:992	A	Japanese Laurel
18S:993	A	Japanese Laurel
18S:994	G	Black
18S:995	A	Japanese Laurel
18S:996	U	Bright Red
18S:997	G	Black
18S:998	A	Japanese Laurel
18S:999	U	Bright Red
18S:1000	C	Dark Blue
18S:1001	A	Japanese Laurel
18S:1002	G	Black
18S:1003	A	Japanese Laurel
18S:1004	U	Bright Red
18S:1005	A	Japanese Laurel
18S:1006	C	Dark Blue
18S:1007	C	Dark Blue
18S:1008	G	Black
18S:1009	U	Bright Red
18S:1010	C	Dark Blue
18S:1011	G	Black
18S:1012	U	Bright Red
18S:1013	A	Japanese Laurel
18S:1014	G	Black
18S:1015	U	Bright Red
18S:1016	C	Dark Blue
18S:1017	U	Bright Red
18S:1018	U	Bright Red
18S:1019	A	Japanese Laurel
18S:1020	A	Japanese Laurel
18S:1021	C	Dark Blue
18S:1022	C	Dark Blue
18S:1023	A	Japanese Laurel
18S:1024	U	Bright Red
18S:1025	A	Japanese Laurel
18S:1026	A	Japanese Laurel
18S:1027	A	Japanese Laurel
18S:1028	C	Dark Blue
18S:1029	U	Bright Red
18S:1030	A	Japanese Laurel
18S:1031	U	Bright Red
18S:1032	G	Black
18S:1033	C	Dark Blue
18S:1034	C	Dark Blue
18S:1035	G	Black
18S:1036	A	Japanese Laurel
18S:1037	C	Dark Blue
18S:1038	U	Bright Red
18S:1039	A	Japanese Laurel
18S:1040	G	Black
18S:1041	G	Black
18S:1042	G	Black
18S:1043	A	Japanese Laurel
18S:1044	U	Bright Red
18S:1045	C	Dark Blue
18S:1046	G	Black
18S:1047	G	Black
18S:1048	G	Black
18S:1049	U	Bright Red
18S:1050	G	Black
18S:1051	G	Black
18S:1052	U	Bright Red
18S:1053	G	Black
18S:1054	U	Bright Red
18S:1055	U	Bright Red
18S:1056	U	Bright Red
18S:1057	U	Bright Red
18S:1058	U	Bright Red
18S:1059	U	Bright Red
18S:1060	U	Bright Red
18S:1061	A	Japanese Laurel
18S:1062	A	Japanese Laurel
18S:1063	U	Bright Red
18S:1064	G	Black
18S:1065	A	Japanese Laurel
18S:1066	C	Dark Blue
18S:1067	C	Dark Blue
18S:1068	C	Dark Blue
18S:1069	A	Japanese Laurel
18S:1070	C	Dark Blue
18S:1071	U	Bright Red
18S:1072	C	Dark Blue
18S:1073	G	Black
18S:1074	G	Black
18S:1075	C	Dark Blue
18S:1076	A	Japanese Laurel
18S:1077	C	Dark Blue
18S:1078	C	Dark Blue
18S:1079	U	Bright Red
18S:1080	U	Bright Red
18S:1081	A	Japanese Laurel
18S:1082	C	Dark Blue
18S:1083	G	Black
18S:1084	A	Japanese Laurel
18S:1085	G	Black
18S:1086	A	Japanese Laurel
18S:1087	A	Japanese Laurel
18S:1088	A	Japanese Laurel
18S:1089	U	Bright Red
18S:1090	C	Dark Blue
18S:1091	A	Japanese Laurel
18S:1092	A	Japanese Laurel
18S:1093	A	Japanese Laurel
18S:1094	G	Black
18S:1095	U	Bright Red
18S:1096	C	Dark Blue
18S:1097	U	Bright Red
18S:1098	U	Bright Red
18S:1099	U	Bright Red
18S:1100	G	Black
18S:1101	G	Black
18S:1102	G	Black
18S:1103	U	Bright Red
18S:1104	U	Bright Red
18S:1105	C	Dark Blue
18S:1106	U	Bright Red
18S:1107	G	Black
18S:1108	G	Black
18S:1109	G	Black
18S:1110	G	Black
18S:1111	G	Black
18S:1112	G	Black
18S:1113	A	Japanese Laurel
18S:1114	G	Black
18S:1115	U	Bright Red
18S:1116	A	Japanese Laurel
18S:1117	U	Bright Red
18S:1118	G	Black
18S:1119	G	Black
18S:1120	U	Bright Red
18S:1121	C	Dark Blue
18S:1122	G	Black
18S:1123	C	Dark Blue
18S:1124	A	Japanese Laurel
18S:1125	A	Japanese Laurel
18S:1126	G	Black
18S:1127	G	Black
18S:1128	C	Dark Blue
18S:1129	U	Bright Red
18S:1130	G	Black
18S:1131	A	Japanese Laurel
18S:1132	A	Japanese Laurel
18S:1133	A	Japanese Laurel
18S:1134	C	Dark Blue
18S:1135	U	Bright Red
18S:1136	U	Bright Red
18S:1137	A	Japanese Laurel
18S:1138	A	Japanese Laurel
18S:1139	A	Japanese Laurel
18S:1140	G	Black
18S:1141	G	Black
18S:1142	A	Japanese Laurel
18S:1143	A	Japanese Laurel
18S:1144	U	Bright Red
18S:1145	U	Bright Red
18S:1146	G	Black
18S:1147	A	Japanese Laurel
18S:1148	C	Dark Blue
18S:1149	G	Black
18S:1150	G	Black
18S:1151	A	Japanese Laurel
18S:1152	A	Japanese Laurel
18S:1153	G	Black
18S:1154	G	Black
18S:1155	G	Black
18S:1156	C	Dark Blue
18S:1157	A	Japanese Laurel
18S:1158	C	Dark Blue
18S:1159	C	Dark Blue
18S:1160	A	Japanese Laurel
18S:1161	C	Dark Blue
18S:1162	C	Dark Blue
18S:1163	A	Japanese Laurel
18S:1164	G	Black
18S:1165	G	Black
18S:1166	A	Japanese Laurel
18S:1167	G	Black
18S:1168	U	Bright Red
18S:1169	G	Black
18S:1170	G	Black
18S:1171	A	Japanese Laurel
18S:1172	G	Black
18S:1173	C	Dark Blue
18S:1174	C	Dark Blue
18S:1175	U	Bright Red
18S:1176	G	Black
18S:1177	C	Dark Blue
18S:1178	G	Black
18S:1179	G	Black
18S:1180	C	Dark Blue
18S:1181	U	Bright Red
18S:1182	U	Bright Red
18S:1183	A	Japanese Laurel
18S:1184	A	Japanese Laurel
18S:1185	U	Bright Red
18S:1186	U	Bright Red
18S:1187	U	Bright Red
18S:1188	G	Black
18S:1189	A	Japanese Laurel
18S:1190	C	Dark Blue
18S:1191	U	Bright Red
18S:1192	C	Dark Blue
18S:1193	A	Japanese Laurel
18S:1194	A	Japanese Laurel
18S:1195	C	Dark Blue
18S:1196	A	Japanese Laurel
18S:1197	C	Dark Blue
18S:1198	G	Black
18S:1199	G	Black
18S:1200	G	Black
18S:1201	G	Black
18S:1202	A	Japanese Laurel
18S:1203	A	Japanese Laurel
18S:1204	A	Japanese Laurel
18S:1205	C	Dark Blue
18S:1206	U	Bright Red
18S:1207	C	Dark Blue
18S:1208	A	Japanese Laurel
18S:1209	C	Dark Blue
18S:1210	C	Dark Blue
18S:1211	A	Japanese Laurel
18S:1212	G	Black
18S:1213	G	Black
18S:1214	U	Bright Red
18S:1215	C	Dark Blue
18S:1216	C	Dark Blue
18S:1217	A	Japanese Laurel
18S:1218	G	Black
18S:1219	A	Japanese Laurel
18S:1220	C	Dark Blue
18S:1221	A	Japanese Laurel
18S:1222	C	Dark Blue
18S:1223	A	Japanese Laurel
18S:1224	A	Japanese Laurel
18S:1225	U	Bright Red
18S:1226	A	Japanese Laurel
18S:1227	A	Japanese Laurel
18S:1228	G	Black
18S:1229	G	Black
18S:1230	A	Japanese Laurel
18S:1231	U	Bright Red
18S:1232	U	Bright Red
18S:1233	G	Black
18S:1234	A	Japanese Laurel
18S:1235	C	Dark Blue
18S:1236	A	Japanese Laurel
18S:1237	G	Black
18S:1238	A	Japanese Laurel
18S:1239	U	Bright Red
18S:1240	U	Bright Red
18S:1241	G	Black
18S:1242	A	Japanese Laurel
18S:1243	G	Black
18S:1244	A	Japanese Laurel
18S:1245	G	Black
18S:1246	C	Dark Blue
18S:1247	U	Bright Red
18S:1248	C	Dark Blue
18S:1249	U	Bright Red
18S:1250	U	Bright Red
18S:1251	U	Bright Red
18S:1252	C	Dark Blue
18S:1253	U	Bright Red
18S:1254	U	Bright Red
18S:1255	G	Black
18S:1256	A	Japanese Laurel
18S:1257	U	Bright Red
18S:1258	U	Bright Red
18S:1259	U	Bright Red
18S:1260	U	Bright Red
18S:1261	G	Black
18S:1262	U	Bright Red
18S:1263	G	Black
18S:1264	G	Black
18S:1265	G	Black
18S:1266	U	Bright Red
18S:1267	G	Black
18S:1268	G	Black
18S:1269	U	Bright Red
18S:1270	G	Black
18S:1271	G	Black
18S:1272	U	Bright Red
18S:1273	G	Black
18S:1274	C	Dark Blue
18S:1275	A	Japanese Laurel
18S:1276	U	Bright Red
18S:1277	G	Black
18S:1278	G	Black
18S:1279	C	Dark Blue
18S:1280	C	Dark Blue
18S:1281	G	Black
18S:1282	U	Bright Red
18S:1283	U	Bright Red
18S:1284	C	Dark Blue
18S:1285	U	Bright Red
18S:1286	U	Bright Red
18S:1287	A	Japanese Laurel
18S:1288	G	Black
18S:1289	U	Bright Red
18S:1290	U	Bright Red
18S:1291	G	Black
18S:1292	G	Black
18S:1293	U	Bright Red
18S:1294	G	Black
18S:1295	G	Black
18S:1296	A	Japanese Laurel
18S:1297	G	Black
18S:1298	U	Bright Red
18S:1299	G	Black
18S:1300	A	Japanese Laurel
18S:1301	U	Bright Red
18S:1302	U	Bright Red
18S:1303	U	Bright Red
18S:1304	G	Black
18S:1305	U	Bright Red
18S:1306	C	Dark Blue
18S:1307	U	Bright Red
18S:1308	G	Black
18S:1309	C	Dark Blue
18S:1310	U	Bright Red
18S:1311	U	Bright Red
18S:1312	A	Japanese Laurel
18S:1313	A	Japanese Laurel
18S:1314	U	Bright Red
18S:1315	U	Bright Red
18S:1316	G	Black
18S:1317	C	Dark Blue
18S:1318	G	Black
18S:1319	A	Japanese Laurel
18S:1320	U	Bright Red
18S:1321	A	Japanese Laurel
18S:1322	A	Japanese Laurel
18S:1323	C	Dark Blue
18S:1324	G	Black
18S:1325	A	Japanese Laurel
18S:1326	A	Japanese Laurel
18S:1327	C	Dark Blue
18S:1328	G	Black
18S:1329	A	Japanese Laurel
18S:1330	G	Black
18S:1331	A	Japanese Laurel
18S:1332	C	Dark Blue
18S:1333	C	Dark Blue
18S:1334	U	Bright Red
18S:1335	U	Bright Red
18S:1336	A	Japanese Laurel
18S:1337	A	Japanese Laurel
18S:1338	C	Dark Blue
18S:1339	C	Dark Blue
18S:1340	U	Bright Red
18S:1341	A	Japanese Laurel
18S:1342	C	Dark Blue
18S:1343	U	Bright Red
18S:1344	A	Japanese Laurel
18S:1345	A	Japanese Laurel
18S:1346	A	Japanese Laurel
18S:1347	U	Bright Red
18S:1348	A	Japanese Laurel
18S:1349	G	Black
18S:1350	U	Bright Red
18S:1351	G	Black
18S:1352	G	Black
18S:1353	U	Bright Red
18S:1354	G	Black
18S:1355	C	Dark Blue
18S:1356	U	Bright Red
18S:1357	A	Japanese Laurel
18S:1358	G	Black
18S:1359	C	Dark Blue
18S:1360	A	Japanese Laurel
18S:1361	U	Bright Red
18S:1362	U	Bright Red
18S:1363	U	Bright Red
18S:1364	G	Black
18S:1365	C	Dark Blue
18S:1366	U	Bright Red
18S:1367	G	Black
18S:1368	G	Black
18S:1369	U	Bright Red
18S:1370	U	Bright Red
18S:1371	A	Japanese Laurel
18S:1372	U	Bright Red
18S:1373	C	Dark Blue
18S:1374	C	Dark Blue
18S:1375	A	Japanese Laurel
18S:1376	C	Dark Blue
18S:1377	U	Bright Red
18S:1378	U	Bright Red
18S:1379	C	Dark Blue
18S:1380	U	Bright Red
18S:1381	U	Bright Red
18S:1382	A	Japanese Laurel
18S:1383	G	Black
18S:1384	A	Japanese Laurel
18S:1385	G	Black
18S:1386	G	Black
18S:1387	G	Black
18S:1388	A	Japanese Laurel
18S:1389	C	Dark Blue
18S:1390	U	Bright Red
18S:1391	A	Japanese Laurel
18S:1392	U	Bright Red
18S:1393	C	Dark Blue
18S:1394	G	Black
18S:1395	G	Black
18S:1396	U	Bright Red
18S:1397	U	Bright Red
18S:1398	U	Bright Red
18S:1399	C	Dark Blue
18S:1400	A	Japanese Laurel
18S:1401	A	Japanese Laurel
18S:1402	G	Black
18S:1403	C	Dark Blue
18S:1404	C	Dark Blue
18S:1405	G	Black
18S:1406	A	Japanese Laurel
18S:1407	U	Bright Red
18S:1408	G	Black
18S:1409	G	Black
18S:1410	A	Japanese Laurel
18S:1411	A	Japanese Laurel
18S:1412	G	Black
18S:1413	U	Bright Red
18S:1414	U	Bright Red
18S:1415	U	Bright Red
18S:1416	G	Black
18S:1417	A	Japanese Laurel
18S:1418	G	Black
18S:1419	G	Black
18S:1420	C	Dark Blue
18S:1421	A	Japanese Laurel
18S:1422	A	Japanese Laurel
18S:1423	U	Bright Red
18S:1424	A	Japanese Laurel
18S:1425	A	Japanese Laurel
18S:1426	C	Dark Blue
18S:1427	A	Japanese Laurel
18S:1428	G	Black
18S:1429	G	Black
18S:1430	U	Bright Red
18S:1431	C	Dark Blue
18S:1432	U	Bright Red
18S:1433	G	Black
18S:1434	U	Bright Red
18S:1435	G	Black
18S:1436	A	Japanese Laurel
18S:1437	U	Bright Red
18S:1438	G	Black
18S:1439	C	Dark Blue
18S:1440	C	Dark Blue
18S:1441	C	Dark Blue
18S:1442	U	Bright Red
18S:1443	U	Bright Red
18S:1444	A	Japanese Laurel
18S:1445	G	Black
18S:1446	A	Japanese Laurel
18S:1447	C	Dark Blue
18S:1448	G	Black
18S:1449	U	Bright Red
18S:1450	U	Bright Red
18S:1451	C	Dark Blue
18S:1452	U	Bright Red
18S:1453	G	Black
18S:1454	G	Black
18S:1455	G	Black
18S:1456	C	Dark Blue
18S:1457	C	Dark Blue
18S:1458	G	Black
18S:1459	C	Dark Blue
18S:1460	A	Japanese Laurel
18S:1461	C	Dark Blue
18S:1462	G	Black
18S:1463	C	Dark Blue
18S:1464	G	Black
18S:1465	C	Dark Blue
18S:1466	G	Black
18S:1467	C	Dark Blue
18S:1468	U	Bright Red
18S:1469	A	Japanese Laurel
18S:1470	C	Dark Blue
18S:1471	A	Japanese Laurel
18S:1472	C	Dark Blue
18S:1473	U	Bright Red
18S:1474	G	Black
18S:1475	A	Japanese Laurel
18S:1476	C	Dark Blue
18S:1477	G	Black
18S:1478	G	Black
18S:1479	A	Japanese Laurel
18S:1480	G	Black
18S:1481	C	Dark Blue
18S:1482	C	Dark Blue
18S:1483	A	Japanese Laurel
18S:1484	G	Black
18S:1485	C	Dark Blue
18S:1486	G	Black
18S:1487	A	Japanese Laurel
18S:1488	G	Black
18S:1489	U	Bright Red
18S:1490	C	Dark Blue
18S:1491	U	Bright Red
18S:1492	A	Japanese Laurel
18S:1493	A	Japanese Laurel
18S:1494	C	Dark Blue
18S:1495	C	Dark Blue
18S:1496	U	Bright Red
18S:1497	U	Bright Red
18S:1498	G	Black
18S:1499	G	Black
18S:1500	C	Dark Blue
18S:1501	C	Dark Blue
18S:1502	G	Black
18S:1503	A	Japanese Laurel
18S:1504	G	Black
18S:1505	A	Japanese Laurel
18S:1506	G	Black
18S:1507	G	Black
18S:1508	U	Bright Red
18S:1509	C	Dark Blue
18S:1510	U	Bright Red
18S:1511	U	Bright Red
18S:1512	G	Black
18S:1513	G	Black
18S:1514	U	Bright Red
18S:1515	A	Japanese Laurel
18S:1516	A	Japanese Laurel
18S:1517	U	Bright Red
18S:1518	C	Dark Blue
18S:1519	U	Bright Red
18S:1520	U	Bright Red
18S:1521	G	Black
18S:1522	U	Bright Red
18S:1523	G	Black
18S:1524	A	Japanese Laurel
18S:1525	A	Japanese Laurel
18S:1526	A	Japanese Laurel
18S:1527	C	Dark Blue
18S:1528	U	Bright Red
18S:1529	C	Dark Blue
18S:1530	C	Dark Blue
18S:1531	G	Black
18S:1532	U	Bright Red
18S:1533	C	Dark Blue
18S:1534	G	Black
18S:1535	U	Bright Red
18S:1536	G	Black
18S:1537	C	Dark Blue
18S:1538	U	Bright Red
18S:1539	G	Black
18S:1540	G	Black
18S:1541	G	Black
18S:1542	G	Black
18S:1543	A	Japanese Laurel
18S:1544	U	Bright Red
18S:1545	A	Japanese Laurel
18S:1546	G	Black
18S:1547	A	Japanese Laurel
18S:1548	G	Black
18S:1549	C	Dark Blue
18S:1550	A	Japanese Laurel
18S:1551	U	Bright Red
18S:1552	U	Bright Red
18S:1553	G	Black
18S:1554	U	Bright Red
18S:1555	A	Japanese Laurel
18S:1556	A	Japanese Laurel
18S:1557	U	Bright Red
18S:1558	U	Bright Red
18S:1559	A	Japanese Laurel
18S:1560	U	Bright Red
18S:1561	U	Bright Red
18S:1562	G	Black
18S:1563	C	Dark Blue
18S:1564	U	Bright Red
18S:1565	C	Dark Blue
18S:1566	U	Bright Red
18S:1567	U	Bright Red
18S:1568	C	Dark Blue
18S:1569	A	Japanese Laurel
18S:1570	A	Japanese Laurel
18S:1571	C	Dark Blue
18S:1572	G	Black
18S:1573	A	Japanese Laurel
18S:1574	G	Black
18S:1575	G	Black
18S:1576	A	Japanese Laurel
18S:1577	A	Japanese Laurel
18S:1578	U	Bright Red
18S:1579	U	Bright Red
18S:1580	C	Dark Blue
18S:1581	C	Dark Blue
18S:1582	U	Bright Red
18S:1583	A	Japanese Laurel
18S:1584	G	Black
18S:1585	U	Bright Red
18S:1586	A	Japanese Laurel
18S:1587	A	Japanese Laurel
18S:1588	G	Black
18S:1589	C	Dark Blue
18S:1590	G	Black
18S:1591	C	Dark Blue
18S:1592	A	Japanese Laurel
18S:1593	A	Japanese Laurel
18S:1594	G	Black
18S:1595	U	Bright Red
18S:1596	C	Dark Blue
18S:1597	A	Japanese Laurel
18S:1598	U	Bright Red
18S:1599	C	Dark Blue
18S:1600	A	Japanese Laurel
18S:1601	G	Black
18S:1602	C	Dark Blue
18S:1603	U	Bright Red
18S:1604	U	Bright Red
18S:1605	G	Black
18S:1606	C	Dark Blue
18S:1607	G	Black
18S:1608	U	Bright Red
18S:1609	U	Bright Red
18S:1610	G	Black
18S:1611	A	Japanese Laurel
18S:1612	U	Bright Red
18S:1613	U	Bright Red
18S:1614	A	Japanese Laurel
18S:1615	C	Dark Blue
18S:1616	G	Black
18S:1617	U	Bright Red
18S:1618	C	Dark Blue
18S:1619	C	Dark Blue
18S:1620	C	Dark Blue
18S:1621	U	Bright Red
18S:1622	G	Black
18S:1623	C	Dark Blue
18S:1624	C	Dark Blue
18S:1625	C	Dark Blue
18S:1626	U	Bright Red
18S:1627	U	Bright Red
18S:1628	U	Bright Red
18S:1629	G	Black
18S:1630	U	Bright Red
18S:1631	A	Japanese Laurel
18S:1632	C	Dark Blue
18S:1633	A	Japanese Laurel
18S:1634	C	Dark Blue
18S:1635	A	Japanese Laurel
18S:1636	C	Dark Blue
18S:1637	C	Dark Blue
18S:1638	G	Black
18S:1639	C	Dark Blue
18S:1640	C	Dark Blue
18S:1641	C	Dark Blue
18S:1642	G	Black
18S:1643	U	Bright Red
18S:1644	C	Dark Blue
18S:1645	G	Black
18S:1646	C	Dark Blue
18S:1647	U	Bright Red
18S:1648	A	Japanese Laurel
18S:1649	G	Black
18S:1650	U	Bright Red
18S:1651	A	Japanese Laurel
18S:1652	C	Dark Blue
18S:1653	C	Dark Blue
18S:1654	G	Black
18S:1655	A	Japanese Laurel
18S:1656	U	Bright Red
18S:1657	U	Bright Red
18S:1658	G	Black
18S:1659	A	Japanese Laurel
18S:1660	A	Japanese Laurel
18S:1661	U	Bright Red
18S:1662	G	Black
18S:1663	G	Black
18S:1664	C	Dark Blue
18S:1665	U	Bright Red
18S:1666	U	Bright Red
18S:1667	A	Japanese Laurel
18S:1668	G	Black
18S:1669	U	Bright Red
18S:1670	G	Black
18S:1671	A	Japanese Laurel
18S:1672	G	Black
18S:1673	G	Black
18S:1674	C	Dark Blue
18S:1675	C	Dark Blue
18S:1676	U	Bright Red
18S:1677	C	Dark Blue
18S:1678	A	Japanese Laurel
18S:1679	G	Black
18S:1680	G	Black
18S:1681	A	Japanese Laurel
18S:1682	U	Bright Red
18S:1683	C	Dark Blue
18S:1684	U	Bright Red
18S:1685	G	Black
18S:1686	C	Dark Blue
18S:1687	U	Bright Red
18S:1688	U	Bright Red
18S:1689	A	Japanese Laurel
18S:1690	G	Black
18S:1691	A	Japanese Laurel
18S:1692	G	Black
18S:1693	A	Japanese Laurel
18S:1694	A	Japanese Laurel
18S:1695	G	Black
18S:1696	G	Black
18S:1697	G	Black
18S:1698	G	Black
18S:1699	G	Black
18S:1700	C	Dark Blue
18S:1701	A	Japanese Laurel
18S:1702	A	Japanese Laurel
18S:1703	C	Dark Blue
18S:1704	U	Bright Red
18S:1705	C	Dark Blue
18S:1706	C	Dark Blue
18S:1707	A	Japanese Laurel
18S:1708	U	Bright Red
18S:1709	C	Dark Blue
18S:1710	U	Bright Red
18S:1711	C	Dark Blue
18S:1712	A	Japanese Laurel
18S:1713	G	Black
18S:1714	A	Japanese Laurel
18S:1715	G	Black
18S:1716	C	Dark Blue
18S:1717	G	Black
18S:1718	G	Black
18S:1719	A	Japanese Laurel
18S:1720	G	Black
18S:1721	A	Japanese Laurel
18S:1722	A	Japanese Laurel
18S:1723	U	Bright Red
18S:1724	U	Bright Red
18S:1725	U	Bright Red
18S:1726	G	Black
18S:1727	G	Black
18S:1728	A	Japanese Laurel
18S:1729	C	Dark Blue
18S:1730	A	Japanese Laurel
18S:1731	A	Japanese Laurel
18S:1732	A	Japanese Laurel
18S:1733	C	Dark Blue
18S:1734	U	Bright Red
18S:1735	U	Bright Red
18S:1736	G	Black
18S:1737	G	Black
18S:1738	U	Bright Red
18S:1739	C	Dark Blue
18S:1740	A	Japanese Laurel
18S:1741	U	Bright Red
18S:1742	U	Bright Red
18S:1743	U	Bright Red
18S:1744	A	Japanese Laurel
18S:1745	G	Black
18S:1746	A	Japanese Laurel
18S:1747	G	Black
18S:1748	G	Black
18S:1749	A	Japanese Laurel
18S:1750	A	Japanese Laurel
18S:1751	C	Dark Blue
18S:1752	U	Bright Red
18S:1753	A	Japanese Laurel
18S:1754	A	Japanese Laurel
18S:1755	A	Japanese Laurel
18S:1756	A	Japanese Laurel
18S:1757	G	Black
18S:1758	U	Bright Red
18S:1759	C	Dark Blue
18S:1760	G	Black
18S:1761	U	Bright Red
18S:1762	A	Japanese Laurel
18S:1763	A	Japanese Laurel
18S:1764	C	Dark Blue
18S:1765	A	Japanese Laurel
18S:1766	A	Japanese Laurel
18S:1767	G	Black
18S:1768	G	Black
18S:1769	U	Bright Red
18S:1770	U	Bright Red
18S:1771	U	Bright Red
18S:1772	C	Dark Blue
18S:1773	C	Dark Blue
18S:1774	G	Black
18S:1775	U	Bright Red
18S:1776	A	Japanese Laurel
18S:1777	G	Black
18S:1778	G	Black
18S:1779	U	Bright Red
18S:1780	G	Black
18S:1781	A	Japanese Laurel
18S:1782	A	Japanese Laurel
18S:1783	C	Dark Blue
18S:1784	C	Dark Blue
18S:1785	U	Bright Red
18S:1786	G	Black
18S:1787	C	Dark Blue
18S:1788	G	Black
18S:1789	G	Black
18S:1790	A	Japanese Laurel
18S:1791	A	Japanese Laurel
18S:1792	G	Black
18S:1793	G	Black
18S:1794	A	Japanese Laurel
18S:1795	U	Bright Red
18S:1796	C	Dark Blue
18S:1797	A	Japanese Laurel
18S:1798	U	Bright Red
18S:1799	U	Bright Red
18S:1800	A	Japanese Laurel
